# Supplementary material for: Inadequate Iodine Intake in Population Groups Defined by Age, Life Stage and Vegetarian Dietary Practice in a Norwegian Convenience Sample
Source: PubMed Central journal article supplement (PMC5852806; doi:10.3390/nu10020230), 2018-02-17
Supplement: nutrients-10-00230-s001.pdf [file nutrients-10-00230-s001.pdf]

## Supplementary Material

**Supplementary Table S1.** Urinary iodine concentration (UIC) in two morning spot urine samples ( $\mu\text{g/L}$ ) and total iodine intake from food and supplements by two 24-hour food records ( $\mu\text{g/day}$ ) in all participants and by non-overlapping subgroups.

| Subgroup                    | n   | UIC                      | UIC                      | <i>p</i> -value <sup>2</sup> | Iodine intake            | Iodine intake            | <i>p</i> -value <sup>2</sup> |
|-----------------------------|-----|--------------------------|--------------------------|------------------------------|--------------------------|--------------------------|------------------------------|
|                             |     | day 1                    | day 2                    |                              | day 1                    | day 2                    |                              |
|                             |     | <i>Median (P25, P75)</i> | <i>Median (P25, P75)</i> |                              | <i>Median (P25, P75)</i> | <i>Median (P25, P75)</i> |                              |
| All participants            | 276 | 93 (55, 140)             | 93 (55, 156)             | 0.46                         | 97 (65, 188)             | 107 (61, 175)            | 0.45                         |
| Subgroup                    |     |                          |                          |                              |                          |                          |                              |
| Children 3–9 years          | 47  | 148 (114, 188)           | 149 (96, 190)            | 0.94                         | 83 (64, 143)             | 104 (63, 140)            | 0.36                         |
| Adolescents 10–17 y         | 46  | 102 (73, 139)            | 112 (78, 167)            | 0.05                         | 91 (57, 177)             | 105 (57, 183)            | 0.40                         |
| Adults 18–64 years          | 71  | 86 (51, 138)             | 92 (56, 155)             | 0.70                         | 111 (72, 194)            | 105 (63, 181)            | 0.65                         |
| Elderly 65+ years           | 23  | 60 (35, 174)             | 67 (51, 83)              | 0.52                         | 116 (73, 184)            | 115 (54, 158)            | 0.39                         |
| Pregnant women              | 45  | 75 (49, 97)              | 87 (49, 133)             | 0.23                         | 156 (87, 239)            | 140 (102, 229)           | 0.20                         |
| OL-vegetarians <sup>3</sup> | 25  | 93 (37, 120)             | 75 (46, 132)             | 0.84                         | 103 (62, 207)            | 92 (74, 139)             | 0.31                         |
| Vegans <sup>3</sup>         | 19  | 50 (37, 70)              | 28 (22, 52)              | 0.07                         | 29 (15, 90)              | 22 (16, 87)              | 0.45                         |

<sup>1</sup> Calculated total iodine intake from food and supplements. <sup>2</sup> *P*-value by the Wilcoxon signed rank test of two related samples. <sup>3</sup> Ovo-Lacto vegetarians (OL-vegetarians) are individuals who reported no meat and fish, but reported intake of eggs and/or milk products in their diet. Vegans are individuals who reported no animal products in their diet.
